# Supplementary material for: Novel D–π–A type triphenylamine based chromogens for DSSC: design, synthesis and performance studies
Source: Royal Society of Chemistry journal article supplement (doi:10.1039/c6nj01314g), 2016-01-01
Supplement: c6nj01314g1.pdf [file c6nj01314g1.pdf]

## **Novel D- $\pi$ -A type Triphenylamine based chromogens for DSSC: Design, synthesis and performance studies**

Behzad Hosseinzadeh <sup>a</sup>, Alireza Salimi Beni<sup>b\*</sup>, Masoume Azari<sup>b</sup>, Maryam Zarandi<sup>b</sup> and Marzeih Karami<sup>b</sup>

<sup>a</sup> *Department of Chemistry, Mazandaran University, Babolsar, Iran*

<sup>b</sup> *Chemistry Department, Yasouj University, Yasouj 75918-74831, Iran*

### **<sup>1</sup>H and <sup>13</sup>C NMR spectra of synthesized compounds**

Spectrum 1 <sup>1</sup>H NMR of **MH**

Spectrum 2 <sup>13</sup>C NMR of **MH**

Spectrum 3 <sup>1</sup>H NMR of **MT**

Spectrum 4 <sup>13</sup>C NMR of **MT**

Spectrum 5 <sup>1</sup>H NMR of **DH**

Spectrum 6 <sup>13</sup>C NMR of **DH**

Spectrum 7 <sup>1</sup>H NMR of **DT**

Spectrum 8 <sup>13</sup>C NMR of **DT**

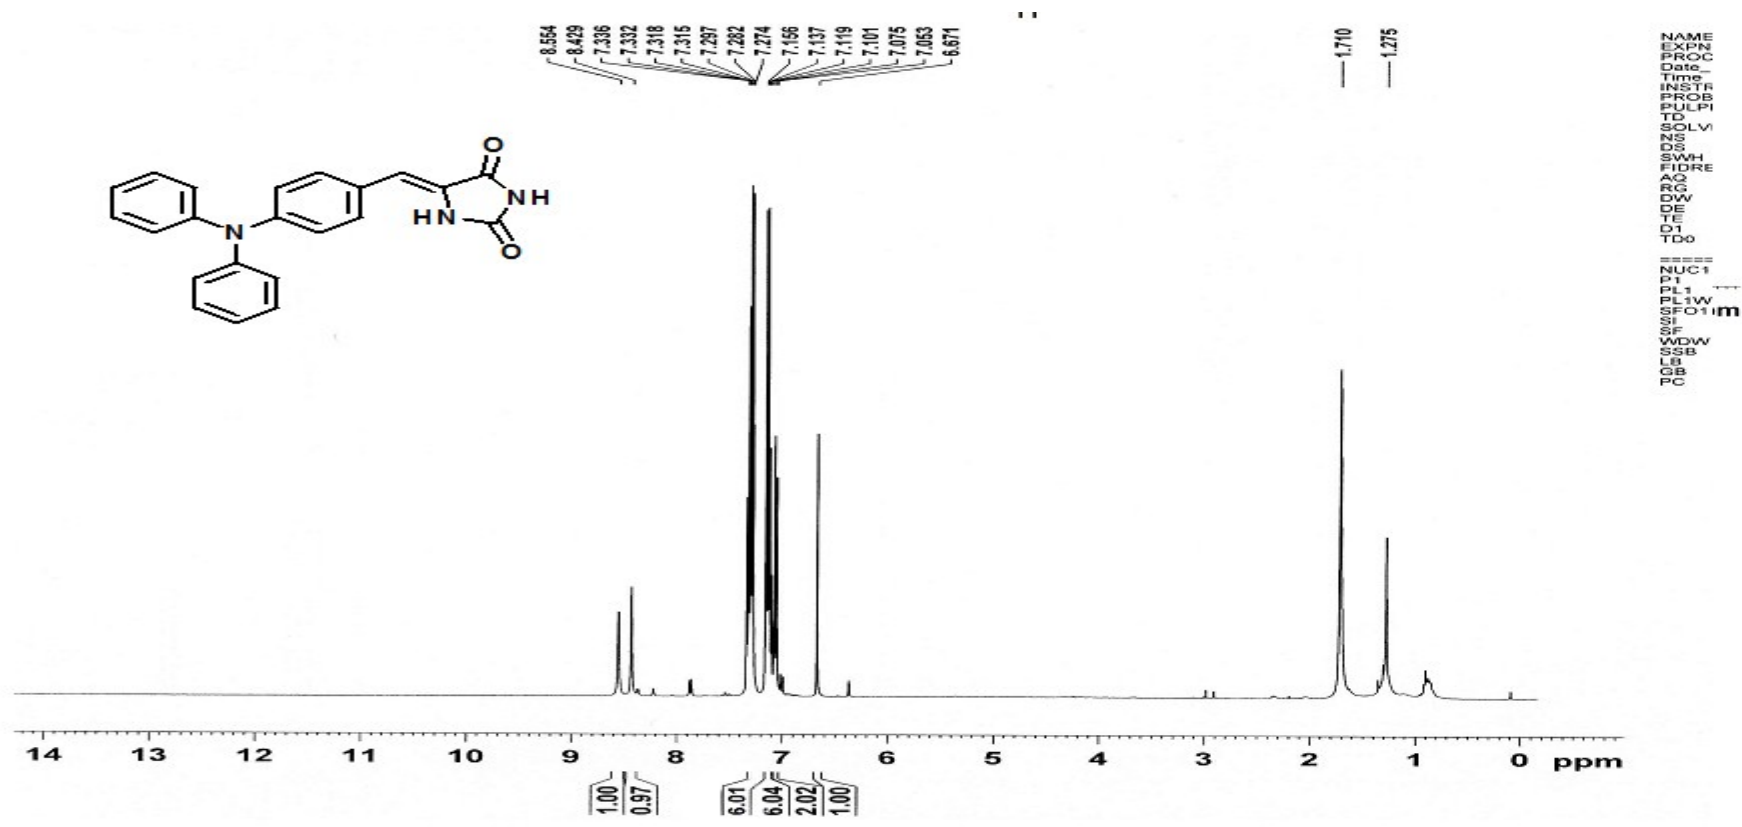

Spectrum 1 <sup>1</sup>H NMR of MH

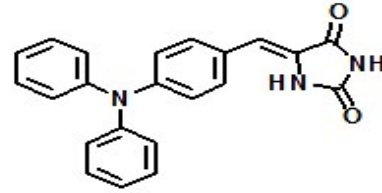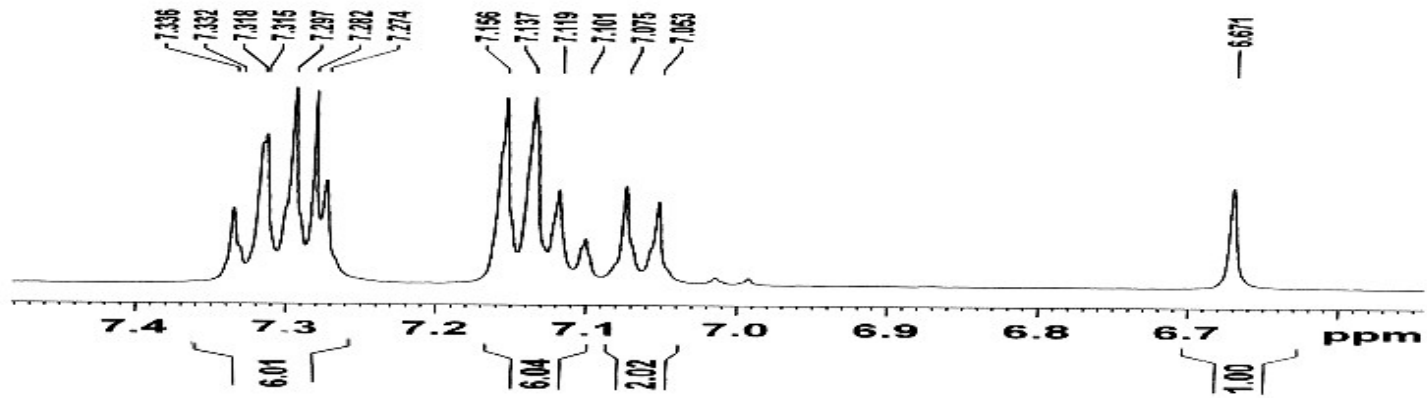

Spectrum 1  $^1\text{H}$  NMR of **MH**

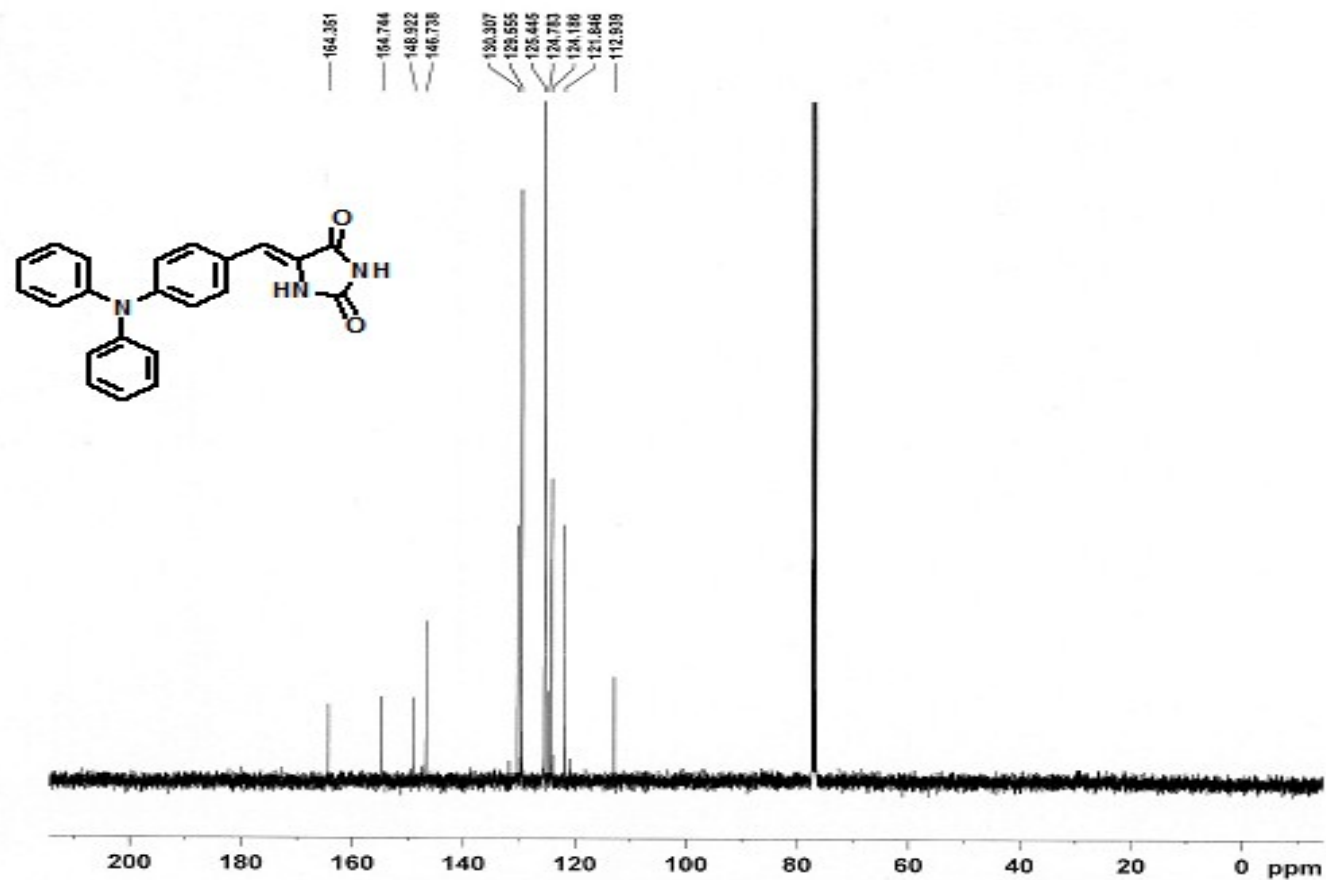

```

NAME Azet H 13C
EXPNO 5
PROCNO 1
Date_ 20110611
Time 15.20
INSTRUM spect
PROBHD 5 mm PABBO SB-
PULPRDG 2000
TD 65536
SOLVENT CDCl3
NS 512
DS 0
SWH 24008.461 Hz
FIDRES 0.386706 Hz
AQ 1.3621898 sec
RG 203
DVB 20.800 usec
DE 6.50 usec
TE 295.2 K
D1 3.0000000 sec
D11 0.0000000 sec
TD0 1

```

```

===== CHANNEL f1 =====
NUC1 13C
P1 7.60 usec
PL1 -2.00 dB
PL1W 50.0202510 W
SFO1 100.626258 MHz

===== CHANNEL f2 =====
CPDPRG2 wa2t16
NUC2 1H
PCPD2 25.00 usec
PL2 0.00 dB
PL12 16.00 dB
PL13 16.00 dB
PL2W 11.20048873 W
PL12W 0.26589381 W
PL13W 0.26589381 W
SFO2 400.1316065 MHz
SI -27.88
SF 100.6127500 MHz
WDW EM
SSB 0
LB 1.00 Hz
GB 0
PC 1.40

```

Spectrum 2 <sup>13</sup>C NMR of MH

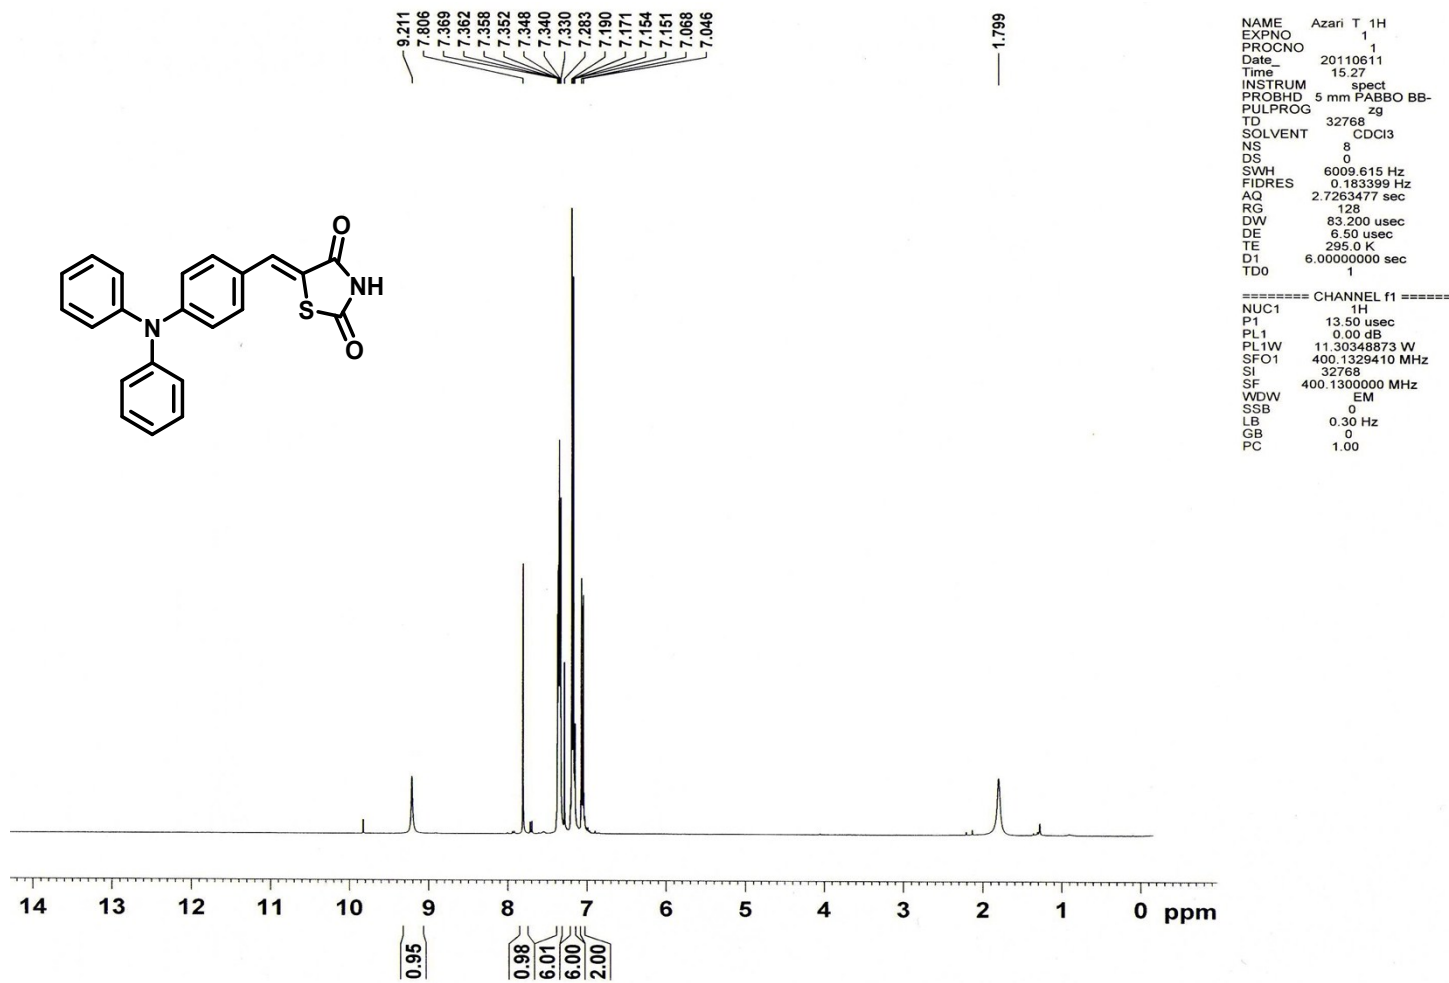

Spectrum 3 <sup>1</sup>H NMR of MT

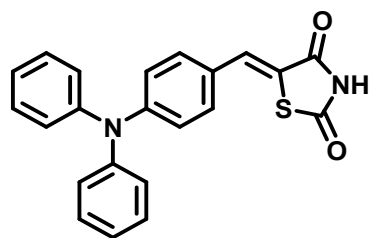

```

NAME Azari T 1H
EXPNO 1
PROCNO 1
Date_ 20110611
Time 15.27
INSTRUM spect
PROBHD 5 mm PABBO BI
PULPROG zg
TD 32768
SOLVENT CDCl3
NS 8
DS 0
SWH 6009.615 Hz
FIDRES 0.183399 Hz
AQ 2.7263477 sec
RG 128
DW 83.200 usec
DE 6.50 usec
TE 295.0 K
D1 6.00000000 sec
TD0 1

```

```

===== CHANNEL f1 ==
NUC1 1H
P1 13.50 usec

```

Spectrum 3  $^1\text{H}$  NMR of **MT**

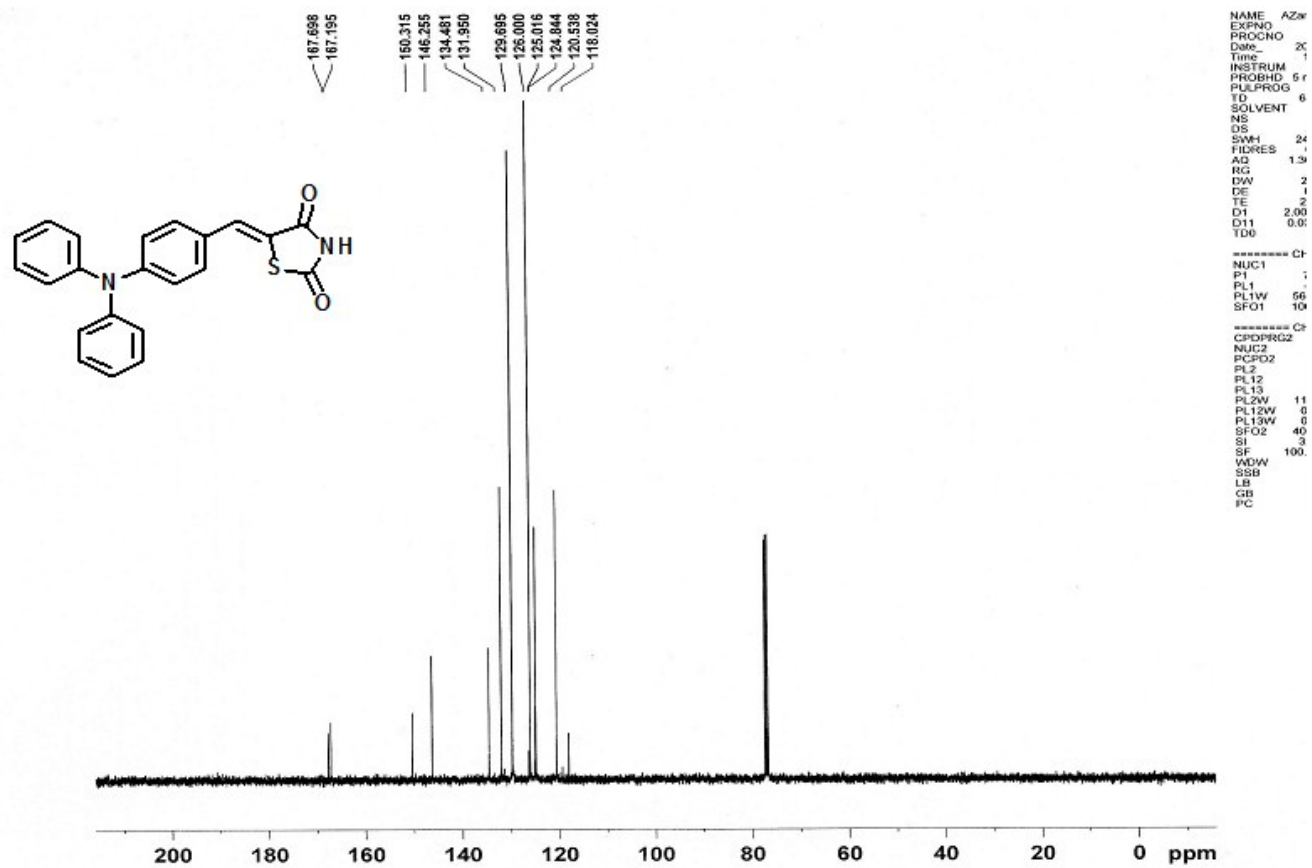

Spectrum 4 <sup>13</sup>C NMR of MT

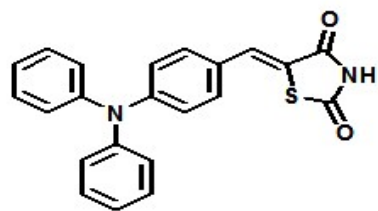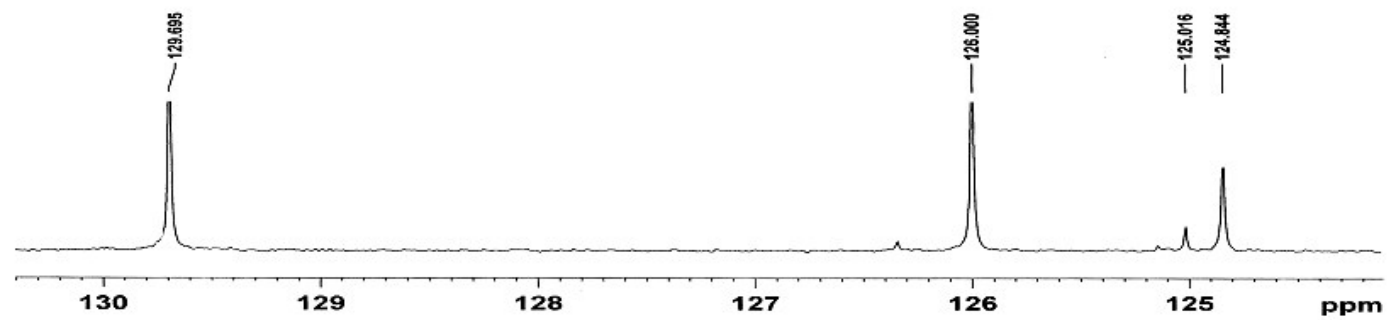

NAME  
EXPNO  
PROCX  
Date\_  
Time  
INSTR1  
PROB1  
PULPR  
TD  
SOLVE  
NS  
DS  
SWH  
FIDRET  
AQ  
RG  
DW  
DE  
TE  
D1  
D11  
TD0  
-----  
NUC1  
P1  
PL1  
PL1W  
SFO1  
-----  
CPDFF  
NUC2  
PCPD2  
PL2  
PL12  
PL13  
PL2W  
PL12W  
PL13W  
SFO2  
SI  
SI  
WDW  
SSH  
LB  
GB  
PC

Spectrum 4 <sup>13</sup>C NMR of MT



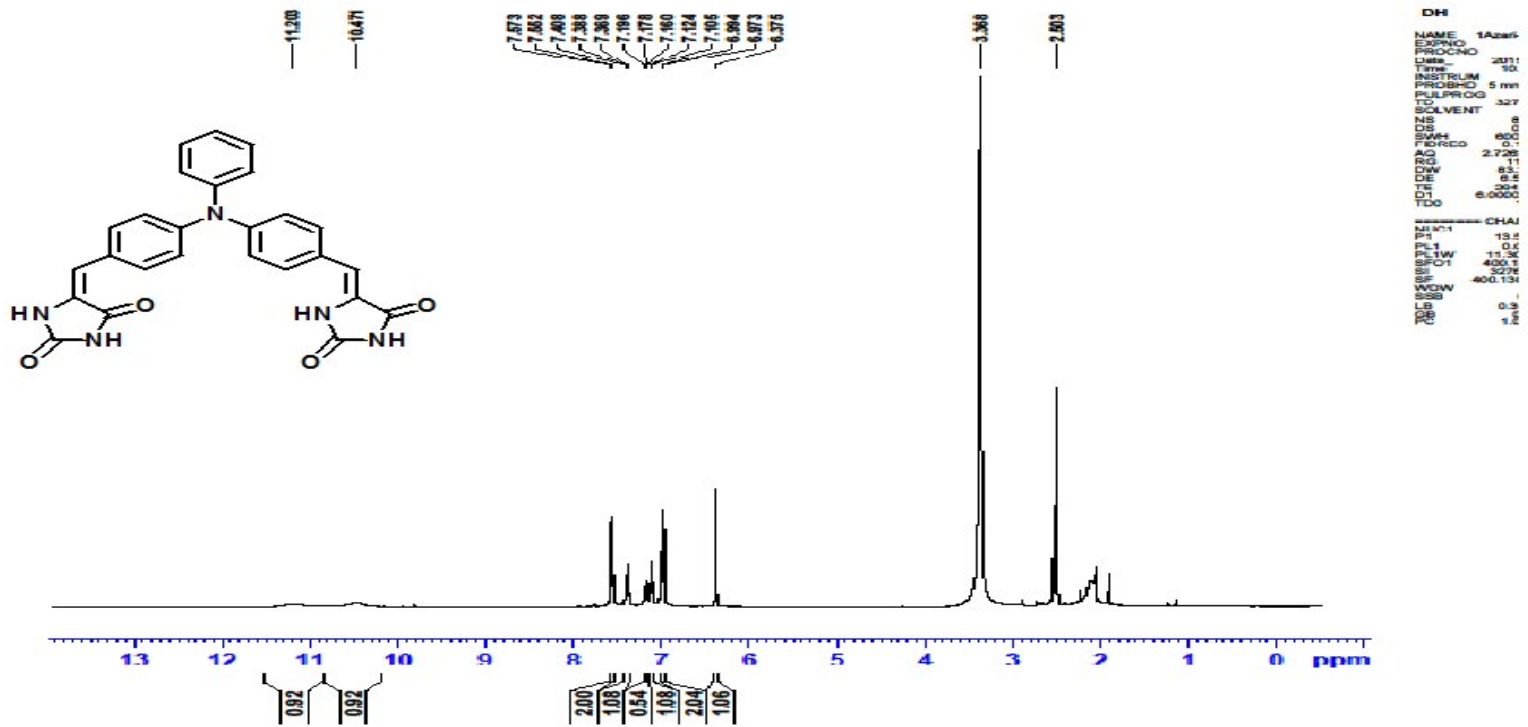

Spectrum 5 <sup>1</sup>H NMR of DH

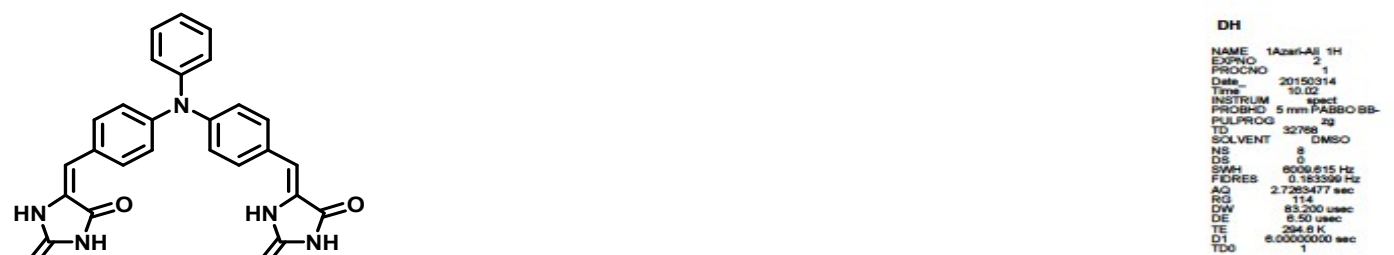

Spectrum 5  $^1\text{H}$  NMR of **DH**

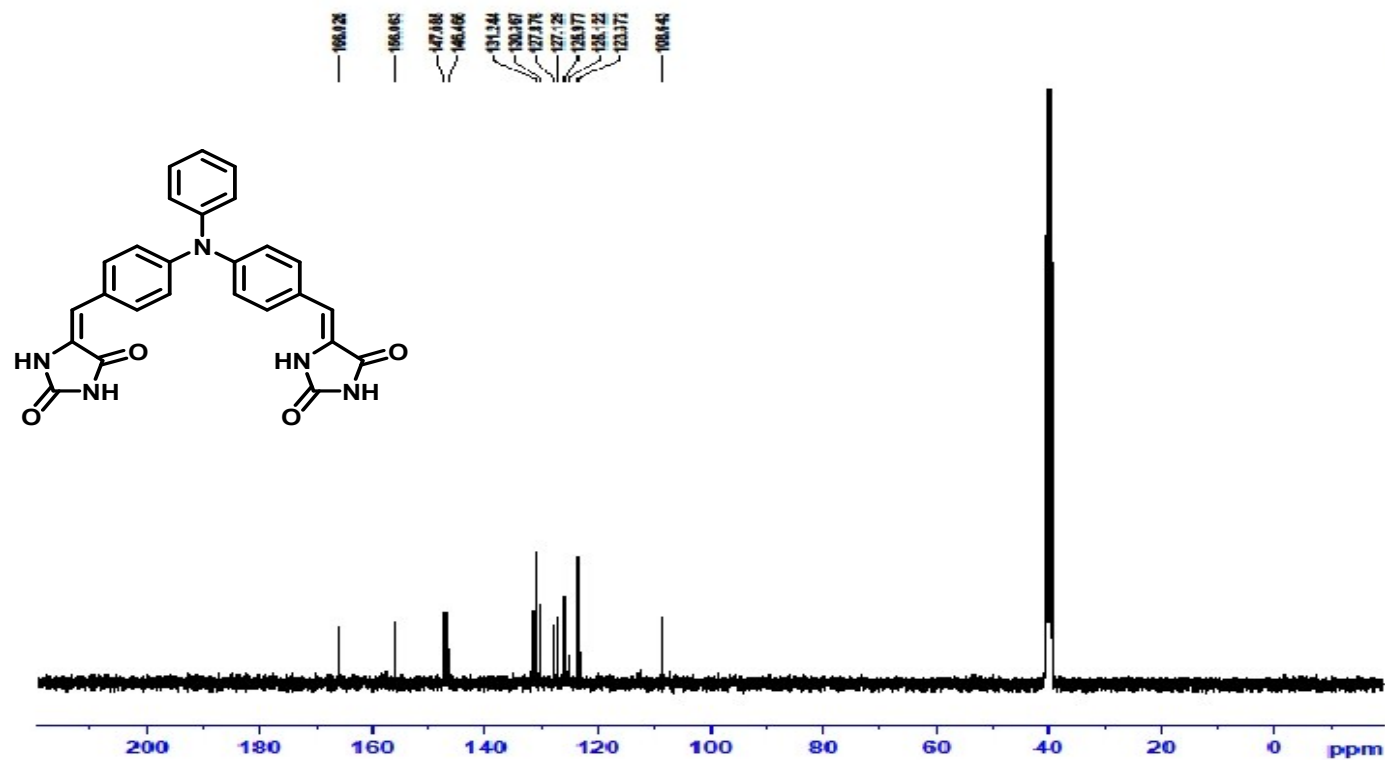

**DH**

```

NAME: 1406146_13C
PROCNO: 1
VEXP: 10232
PROBHD: 5 mm QNP1H2 90
PULPROG: zgpg30
SOLVENT: DMSO
NS: 64
DS: 4
AQ: 1.24000000
RG: 327.500000
AQ2: 0.000000
F2: 100.626180
F1: 500.137000
NUC1: 13C
NUC2: 1H
PCPDW: 1.000000
PCPDW2: 1.000000
PCPDW3: 1.000000
PCPDW4: 1.000000
PCPDW5: 1.000000
PCPDW6: 1.000000
PCPDW7: 1.000000
PCPDW8: 1.000000
PCPDW9: 1.000000
PCPDW10: 1.000000
PCPDW11: 1.000000
PCPDW12: 1.000000
PCPDW13: 1.000000
PCPDW14: 1.000000
PCPDW15: 1.000000
PCPDW16: 1.000000
PCPDW17: 1.000000
PCPDW18: 1.000000
PCPDW19: 1.000000
PCPDW20: 1.000000
PCPDW21: 1.000000
PCPDW22: 1.000000
PCPDW23: 1.000000
PCPDW24: 1.000000
PCPDW25: 1.000000
PCPDW26: 1.000000
PCPDW27: 1.000000
PCPDW28: 1.000000
PCPDW29: 1.000000
PCPDW30: 1.000000
PCPDW31: 1.000000
PCPDW32: 1.000000
PCPDW33: 1.000000
PCPDW34: 1.000000
PCPDW35: 1.000000
PCPDW36: 1.000000
PCPDW37: 1.000000
PCPDW38: 1.000000
PCPDW39: 1.000000
PCPDW40: 1.000000
PCPDW41: 1.000000
PCPDW42: 1.000000
PCPDW43: 1.000000
PCPDW44: 1.000000
PCPDW45: 1.000000
PCPDW46: 1.000000
PCPDW47: 1.000000
PCPDW48: 1.000000
PCPDW49: 1.000000
PCPDW50: 1.000000
PCPDW51: 1.000000
PCPDW52: 1.000000
PCPDW53: 1.000000
PCPDW54: 1.000000
PCPDW55: 1.000000
PCPDW56: 1.000000
PCPDW57: 1.000000
PCPDW58: 1.000000
PCPDW59: 1.000000
PCPDW60: 1.000000
PCPDW61: 1.000000
PCPDW62: 1.000000
PCPDW63: 1.000000
PCPDW64: 1.000000
PCPDW65: 1.000000
PCPDW66: 1.000000
PCPDW67: 1.000000
PCPDW68: 1.000000
PCPDW69: 1.000000
PCPDW70: 1.000000
PCPDW71: 1.000000
PCPDW72: 1.000000
PCPDW73: 1.000000
PCPDW74: 1.000000
PCPDW75: 1.000000
PCPDW76: 1.000000
PCPDW77: 1.000000
PCPDW78: 1.000000
PCPDW79: 1.000000
PCPDW80: 1.000000
PCPDW81: 1.000000
PCPDW82: 1.000000
PCPDW83: 1.000000
PCPDW84: 1.000000
PCPDW85: 1.000000
PCPDW86: 1.000000
PCPDW87: 1.000000
PCPDW88: 1.000000
PCPDW89: 1.000000
PCPDW90: 1.000000
PCPDW91: 1.000000
PCPDW92: 1.000000
PCPDW93: 1.000000
PCPDW94: 1.000000
PCPDW95: 1.000000
PCPDW96: 1.000000
PCPDW97: 1.000000
PCPDW98: 1.000000
PCPDW99: 1.000000
PCPDW100: 1.000000

```

Spectrum 6 <sup>13</sup>C NMR of DH

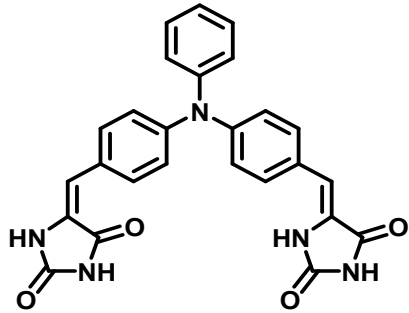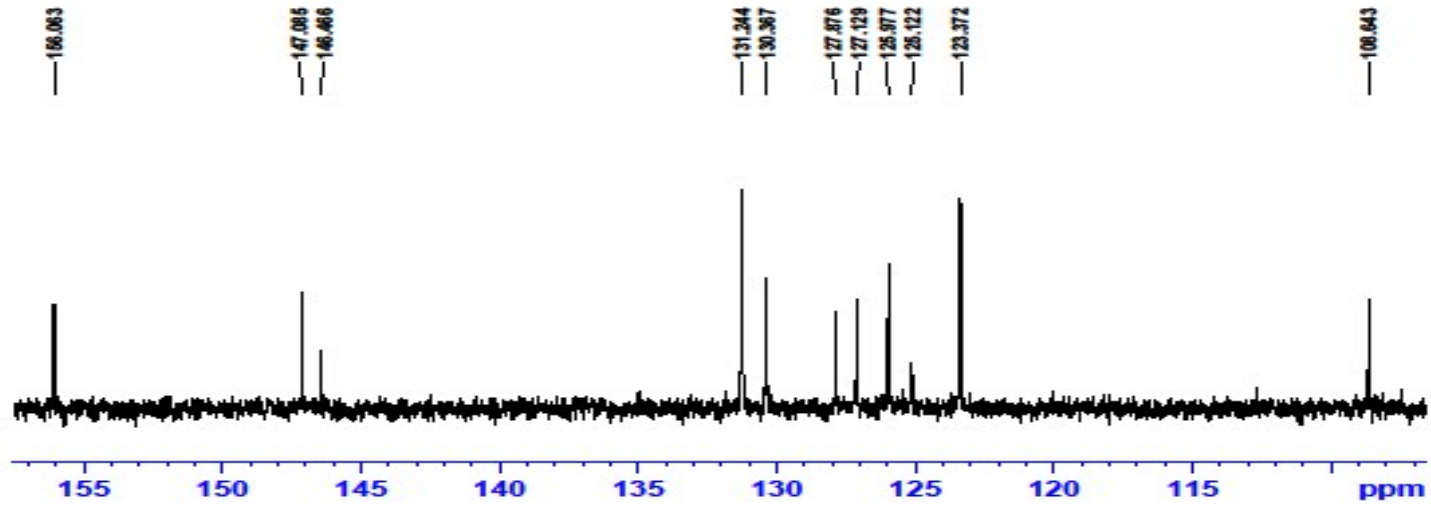

Spectrum 6  $^{13}\text{C}$  NMR of **DH**

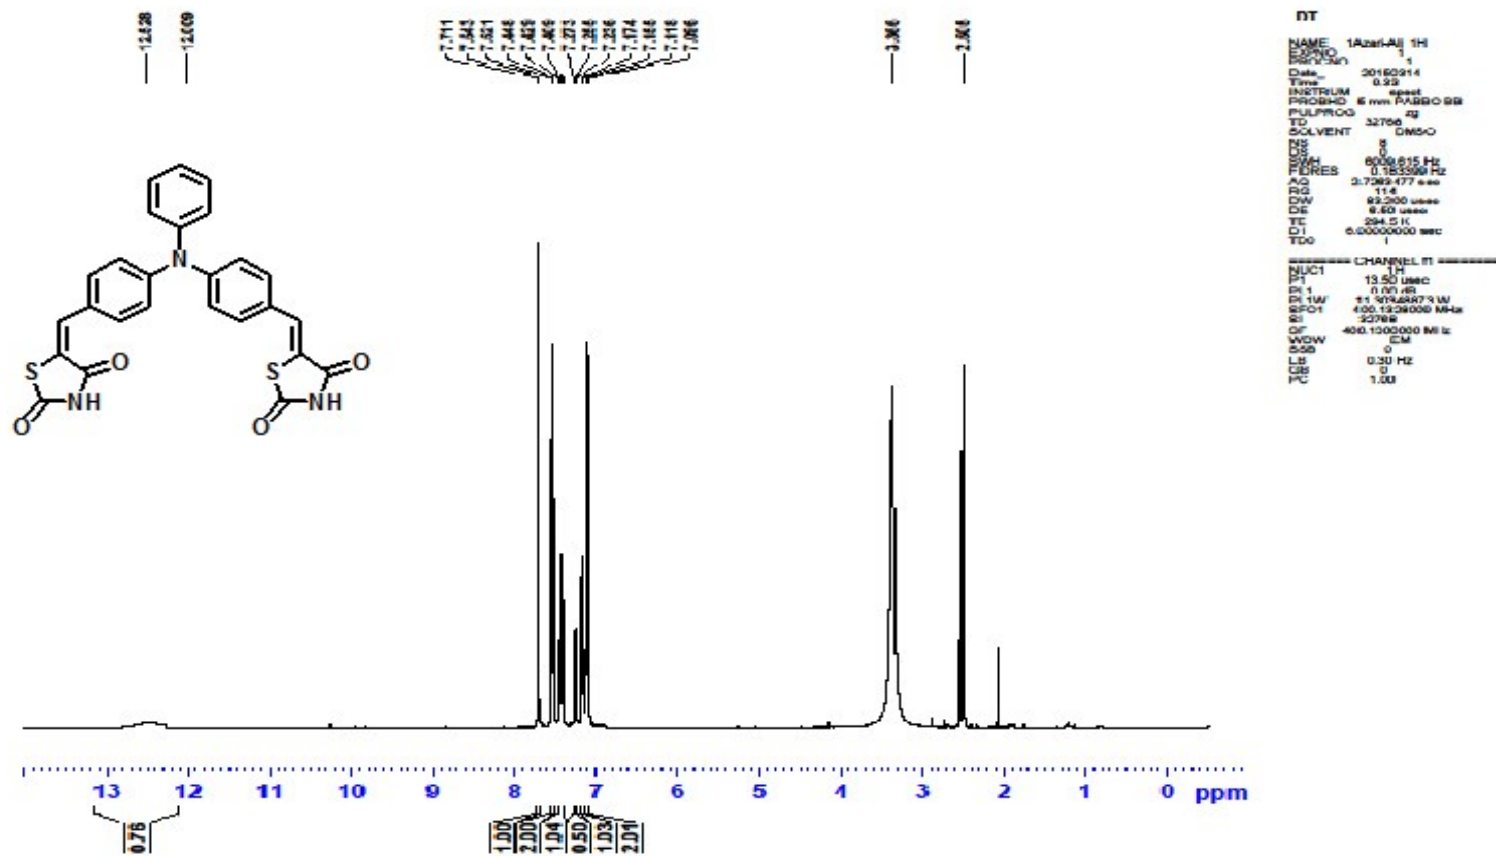

Spectrum 7 <sup>1</sup>H NMR of DT

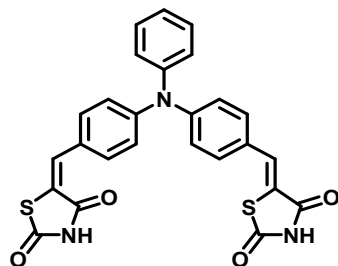

**DT**

```

NAME 1AzarAJ 1H
EXPNO 1
PROCNO 1
Date_ 20150314
Time 9.33
INSTRUM spect
PROBHD 5 mm PABBO BB-
PULPROG zg
TD 32768
SOLVENT DMSO
NS 8
DS 0
SWH 8000.615 Hz
FIDRES 0.183399 Hz
AQ 2.7295477 sec
RG 114
DE 63.200 usec
DS 8.50 usec
TE 294.5 K
D1 6.0000000 sec
TD0 1
----- CHANNEL f1 -----
NUC1 1H
P1 13.50 usec
PL1 0.00 dB
PL1W 11.30348873 W
SFO1 400.1326009 MHz
SI 32768
SF 400.1300000 MHz
WDW EM
SSB 0
LB 0.30 Hz
GB 0
PC 1.00

```

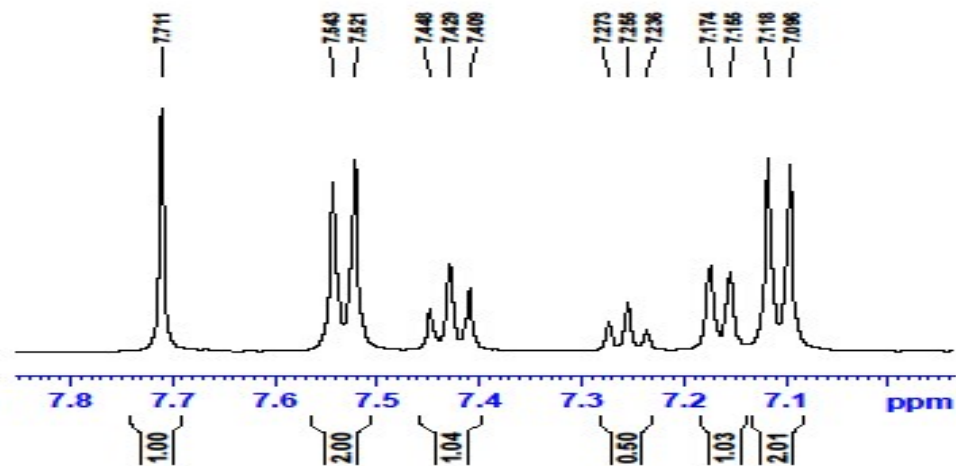

Spectrum 7 <sup>1</sup>H NMR of DT

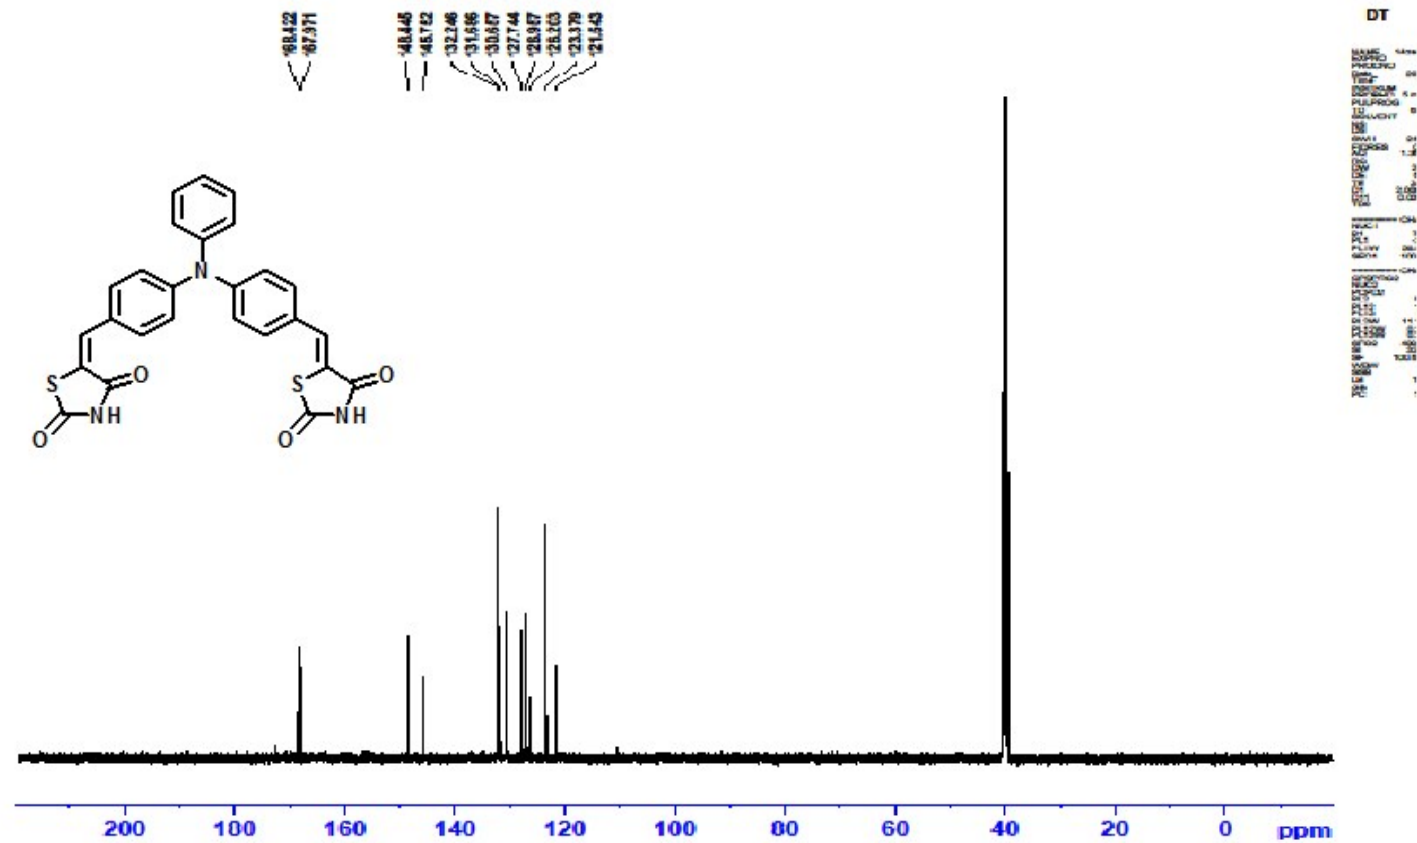

Spectrum 8 <sup>13</sup>C NMR of DT

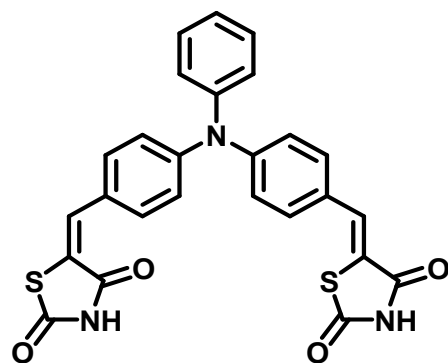

DT

```

NAME: 0406148 13C
PROCNO: 1
EXPNO: 20150314
F2: 9.40
PROBHD: 5 mm 1H/13C BBI-
PULPROG: zgpg
TD: 65536
SOLVENT: DMSO
NS: 400
DS: 4
SWH: 24026.481 Hz
F2RES: 0.260788 Hz
AQ: 1.267098 sec
RG: 370
DE: 0.50 uMm
TE: 300.2 K
DT: 0.0000000 sec
CT: 0.0000000 sec
TSD: 1
  
```

```

===== CHANNEL f1 =====
NUC1: 13C
P1: 7.50 uMm
PL1: 0.10 dB
PL12: 06.5000000 W
RF1: 100.6200000 MHz
===== CHANNEL f2 =====
CPDPRG2: waltz16
NUC2: 13C
P2: 80.00 uMm
PL2: 0.10 dB
PL13: 18.00 dB
PL14: 18.00 dB
PL15: 11.2000000 W
PL16: 0.2000000 W
PL17: 0.2000000 W
RF2: 400.1218000 MHz
SFO: 100.6200000 MHz
SSB: 0
WDW: EM
GB: 0
PC: 1.00 Hz
  
```

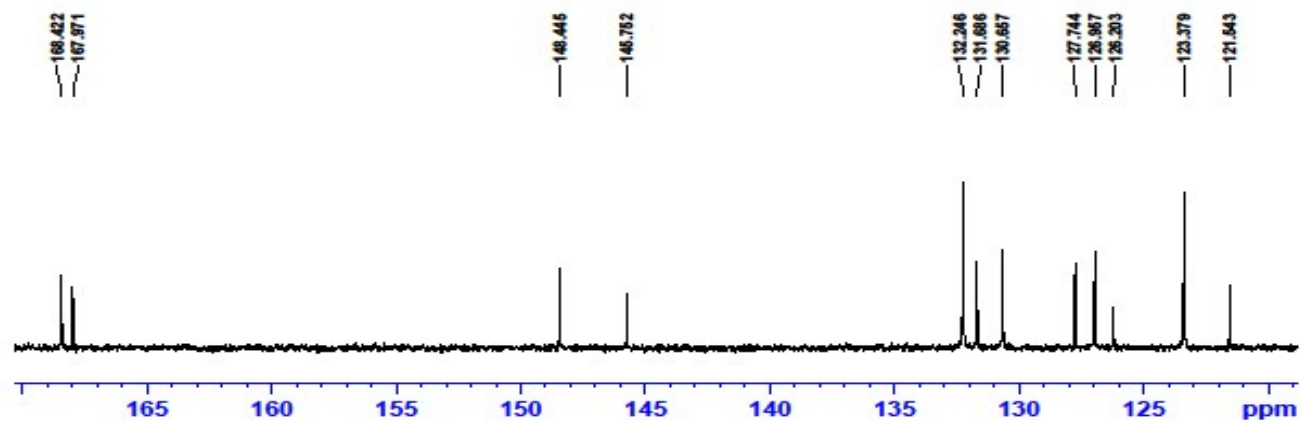

Spectrum 8  $^{13}\text{C}$  NMR of DT
